# Supplementary material for: Ferroan Dolomitization by Seawater Interaction with Mafic Igneous Dikes and Carbonate Host Rock at the Latemar Platform, Dolomites, Italy: Numerical Modeling of Spatial, Temporal, and Temperature Data
Source: Hindawi journal article supplement (doi:10.1155/2017/6590672), 2017-01-01
Supplement: f1 [file 6590672.f1.pdf]

**Appendix A: Topographic map of the Latemar platform, the red lines indicate the sampled transects.**

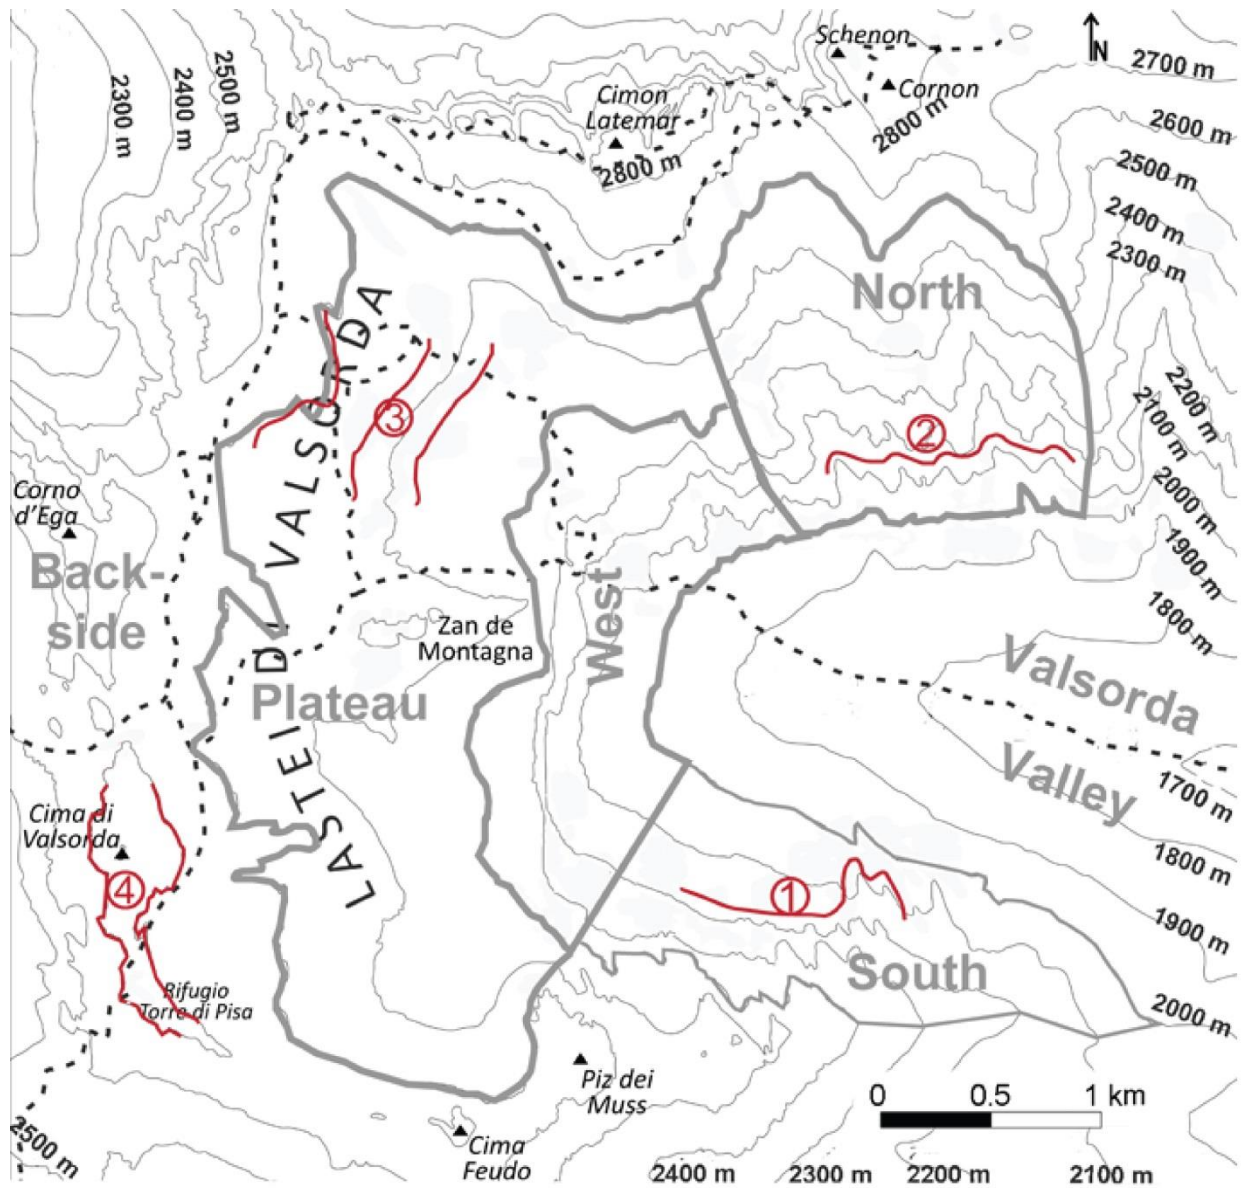

**Appendix B: Estimated FeCO<sub>3</sub>-content based on the d<sub>104</sub>-values from XRD-diffractograms.**

| Measurement | d <sub>104</sub> (Å) | Wt.% FeCO <sub>3</sub> |
|-------------|----------------------|------------------------|
| 1           | 2.8853               | >0.5                   |
| 2           | 2.8867               | 1.50                   |
| 3           | 2.8915               | 5.30                   |
| 4           | 2.8917               | 5.46                   |
| 5           | 2.8971               | 10.02                  |

**Appendix C: EMPA-results for carbonate phases (in wt.% oxides).**

| SiO <sub>2</sub> | Al <sub>2</sub> O <sub>3</sub> | MgO   | ZnO   | CaO   | FeO  | MnO  |
|------------------|--------------------------------|-------|-------|-------|------|------|
| 2.27             | 0.81                           | 1.96  | 0.05  | 53.48 | 2.73 | 0.71 |
| 4.14             | 0.91                           | 2.06  | 0.03  | 53.08 | 2.62 | 0.63 |
| 0.73             | 0.28                           | 1.43  | 0.01  | 52.71 | 0.47 | 0.99 |
| 6.35             | 2.07                           | 1.56  | 0.06  | 48.49 | 1.27 | 0.05 |
| 0.04             | 0.00                           | 0.14  | 0.02  | 59.48 | 0.04 | 0.07 |
| 3.74             | 1.37                           | 2.73  | 0.04  | 50.97 | 0.65 | 0.06 |
| 0.02             | 0.01                           | 14.31 | 0.035 | 36.98 | 8.03 | 0.33 |

## Appendix D: Example XRD-diffractogram of the mafic dikes cross-cutting the platform

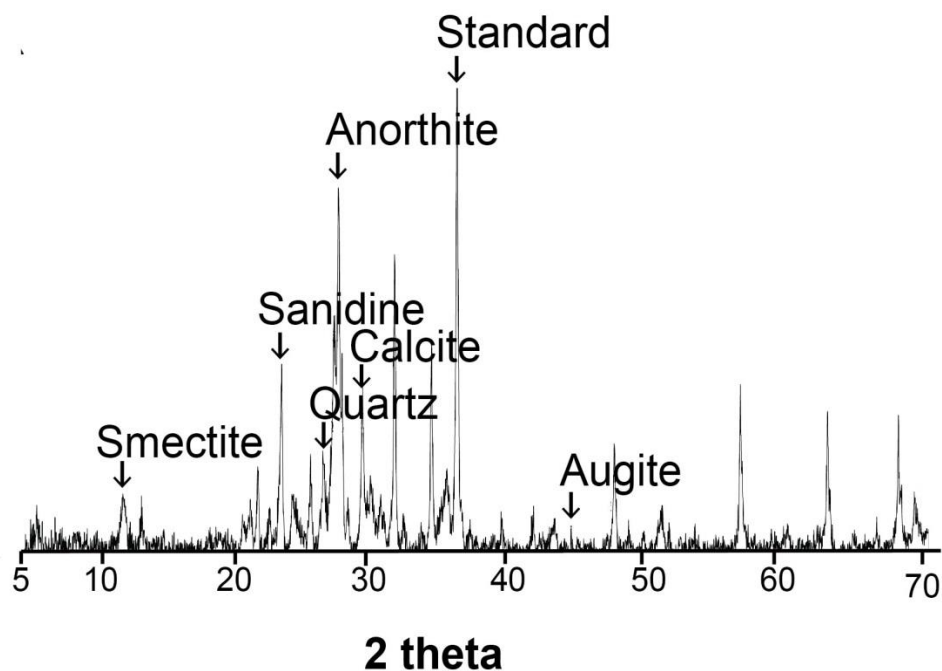

## Appendix E: Additional BSE image (left) and SEM-EDS spectra (right) illustrating the difference between unaltered and altered pyroxene.

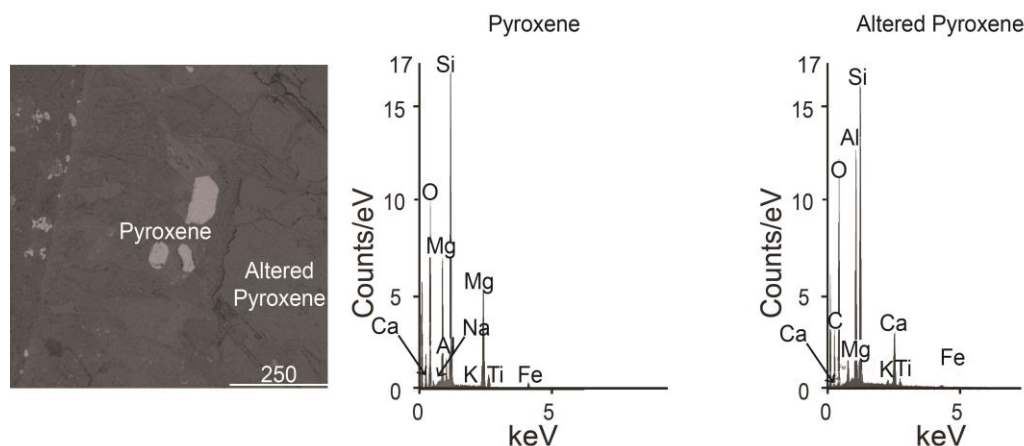

## Appendix F: The fluid speciation of major components after dike-seawater interaction, but prior to dolomitization at 40°C, 60°C and 80°C and 0.02 GPa.

**40°C**

| Species          | mol/kg H <sub>2</sub> O | Species               | mol/kg H <sub>2</sub> O | pH   |
|------------------|-------------------------|-----------------------|-------------------------|------|
| Ca <sup>+2</sup> | 1.03·10 <sup>-2</sup>   | SiO <sub>2</sub> (aq) | 9.99·10 <sup>-5</sup>   | 8.43 |
| K <sup>+</sup>   | 1.02·10 <sup>-2</sup>   | Cl <sup>-</sup>       | 0.546                   |      |
| Mg <sup>+2</sup> | 5.31·10 <sup>-2</sup>   | Fe <sup>+2</sup>      | 2.84 ·10 <sup>-4</sup>  |      |

|                               |                              |                       |                              |           |      |
|-------------------------------|------------------------------|-----------------------|------------------------------|-----------|------|
| Na <sup>+</sup>               | 0.468                        | Al <sup>+3</sup>      | 2.25 · 10 <sup>-4</sup>      |           |      |
| SO <sub>4</sub> <sup>-2</sup> | 2.8 · 10 <sup>-2</sup>       | HCO <sup>-3</sup>     | 2.36 · 10 <sup>-3</sup>      |           |      |
| <b>60°C</b>                   |                              |                       |                              |           |      |
| <b>Species</b>                | <b>mol/kg H<sub>2</sub>O</b> | <b>Species</b>        | <b>mol/kg H<sub>2</sub>O</b> | <b>pH</b> |      |
| Ca <sup>+2</sup>              | 1.03 · 10 <sup>-2</sup>      | SiO <sub>2</sub> (aq) | 9.99 · 10 <sup>-5</sup>      |           | 8.08 |
| K <sup>+</sup>                | 1.02 · 10 <sup>-2</sup>      | Cl <sup>-</sup>       | 0.546                        |           |      |
| Mg <sup>+2</sup>              | 5.31 · 10 <sup>-2</sup>      | Fe <sup>+2</sup>      | 1.64 · 10 <sup>-4</sup>      |           |      |
| Na <sup>+</sup>               | 0.468                        | Al <sup>+3</sup>      | 1.64 · 10 <sup>-4</sup>      |           |      |
| SO <sub>4</sub> <sup>-2</sup> | 2.8 · 10 <sup>-2</sup>       | HCO <sup>-3</sup>     | 2.36 · 10 <sup>-3</sup>      |           |      |
| <b>80°C</b>                   |                              |                       |                              |           |      |
| <b>Species</b>                | <b>mol/kg H<sub>2</sub>O</b> | <b>Species</b>        | <b>mol/kg H<sub>2</sub>O</b> | <b>pH</b> |      |
| Ca <sup>+2</sup>              | 1.03 · 10 <sup>-2</sup>      | SiO <sub>2</sub> (aq) | 9.99 · 10 <sup>-5</sup>      |           | 7.71 |
| K <sup>+</sup>                | 1.02 · 10 <sup>-2</sup>      | Cl <sup>-</sup>       | 0.546                        |           |      |
| Mg <sup>+2</sup>              | 5.31 · 10 <sup>-2</sup>      | Fe <sup>+2</sup>      | 1.30 · 10 <sup>-4</sup>      |           |      |
| Na <sup>+</sup>               | 0.468                        | Al <sup>+3</sup>      | 1.30 · 10 <sup>-4</sup>      |           |      |
| SO <sub>4</sub> <sup>-2</sup> | 2.8 · 10 <sup>-2</sup>       | HCO <sup>-3</sup>     | 2.36 · 10 <sup>-3</sup>      |           |      |
